# Supplementary material for: Outdoor Finishing of Intact Male Portuguese Alentejano Pigs on a Sustainable High-Fiber Diet: Impacts on Blood, Growth, Carcass, Meat Quality and Boar Taint Compounds
Source: MDPI journal article supplement (doi:10.3390/ani13132221), 2023-07-06
Supplement: s1 [file s1]

**Table S1.** Chemical composition of the commercial and experimental diets consumed by Alentejano pigs slaughtered at ~160 kg LW

|                                   | Growing<br>diet A <sup>1</sup> | Growing<br>diet B <sup>2</sup> | Fattening<br>diet <sup>3</sup> | Experimental<br>diet <sup>4</sup> |
|-----------------------------------|--------------------------------|--------------------------------|--------------------------------|-----------------------------------|
|                                   | (g/100 g)                      |                                |                                |                                   |
| Dry matter (DM)                   | 90.7                           | 91.8                           | 90.8                           | 90.5                              |
|                                   | (g/100 g DM)                   |                                |                                |                                   |
| Total ashes                       | 7.6                            | 7.1                            | 8.1                            | 8.2                               |
| Crude protein (N x 6.25)          | 16.8                           | 16.0                           | 13.8                           | 13.8                              |
| Total fiber <sup>5</sup>          | 17.4                           | 23.6                           | 26.9                           | 40.2                              |
| Insoluble fiber <sup>5</sup>      | 6.1                            | 13.1                           | 15.1                           | 28.0                              |
| Neutral detergent fiber (NDF)     | 24.1                           | 25.3                           | 22.6                           | 29.9                              |
| Acid detergent fiber (ADF)        | 7.3                            | 11.1                           | 9.4                            | 13.2                              |
| Acid detergent lignin (ADL)       | 0.74                           | 1.59                           | 1.64                           | 0.90                              |
| Hemicellulose <sup>6</sup>        | 16.8                           | 14.2                           | 13.2                           | 16.7                              |
| Cellulose <sup>7</sup>            | 5.5                            | 9.1                            | 6.5                            | 10.4                              |
| Total sugars <sup>8</sup>         | 3.5                            | 3.1                            | 3.0                            | 1.88                              |
| Total starch <sup>9</sup>         | 47.0                           | 51.8                           | 45.5                           | 40.1                              |
| Total lipids                      | 3.0                            | 4.0                            | 6.8                            | 6.2                               |
| Palmitic acid (C16:0)             | 0.44                           | 0.45                           | 0.66                           | 0.66                              |
| Oleic acid (C18:1 <i>n</i> -9)    | 1.88                           | 3.03                           | 4.42                           | 5.41                              |
| Linoleic acid (C18:2 <i>n</i> -6) | 1.33                           | 1.01                           | 1.66                           | 1.55                              |
| Saturated fatty acids             | 0.44                           | 0.56                           | 0.88                           | 0.88                              |
| Monounsaturated fatty acids       | 1.88                           | 3.03                           | 4.42                           | 5.41                              |
| Polyunsaturated fatty acids       | 1.33                           | 1.01                           | 1.77                           | 1.66                              |
| Σ <i>n</i> -3                     | 0.09                           | 0.10                           | 0.14                           | 0.15                              |
| Σ <i>n</i> -6                     | 1.20                           | 0.94                           | 1.46                           | 1.39                              |
|                                   | (MJ/kg)                        |                                |                                |                                   |
| Digestible energy <sup>10</sup>   | 13.6                           | 13.2                           | 13.2                           | 13.1                              |

Notes: <sup>1</sup>Fed from 40 to 60 kg LW to all experimental groups; <sup>2</sup>Fed from 60 to 120 kg to all experimental groups; <sup>3</sup>Fed from 120 to 160 kg to C and I group and from 120 to 130 kg to IExp group; <sup>4</sup>Fed from 130 to 160 kg to IExp group; <sup>5</sup>[1] method 991.43; <sup>6</sup>Hemicellulose = NDF-ADF; <sup>7</sup>[2]; <sup>8</sup>[1] method 982.14; <sup>9</sup>[3]; <sup>10</sup>[4].

#### References:

1. AOAC. *Official Methods of Analysis of AOAC International*, 18th ed.; AOAC: Gaithersburg, MD, 2006.
2. ISO-6865. Animal feeding stuffs - Determination of crude fibre content - Method with intermediate filtration. **2000**, ISO 6865, 10.
3. ISO-6493. Animal feeding stuffs - Determination of starch content - Polarimetric method. **2000**, ISO 6493, 10.
4. Noblet, J.; Fortune, H.; Dupire, C.; Dubois, S. Digestible, metabolizable and net energy values of 13 feedstuffs for growing pigs: effect of energy system. *Animal Feed Science and Technology* **1993**, 42, 131 - 149.
